# Supplementary material for: Efficacy and Safety of High-Dose Ivermectin for Reducing Malaria Transmission (IVERMAL): Protocol for a Double-Blind, Randomized, Placebo-Controlled, Dose-Finding Trial in Western Kenya
Source: PubMed Central journal article supplement (PMC5133431; doi:10.2196/resprot.6617), 2016-11-17

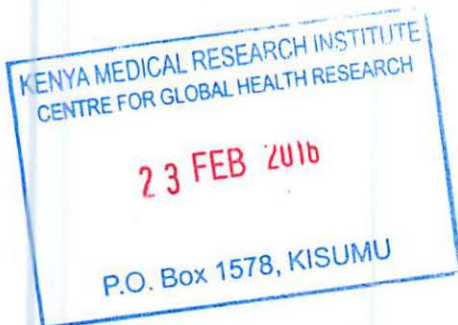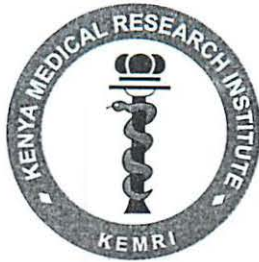

# KENYA MEDICAL RESEARCH INSTITUTE

P.O. Box 54840-00200 NAIROBI - Kenya  
Tel: (254) (020) 2722541, 254 (020) 2713349, 0722-205901, 0733-400003 Fax (254) (020) 2720030  
Email: director@kemri.org info@kemri.org Website: www.kemri.org

KEMRI/RES/7/3/1

February 16, 2016

TO: **DR. MENNO SMIT & DR. ERIC OCHOMO,  
PRINCIPAL INVESTIGATORS**

Through **DR. STEPHEN MUNGA,  
THE DIRECTOR, CGHR,  
KISUMU**

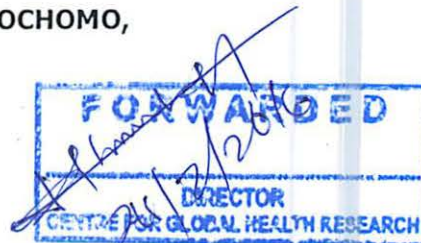

Dear Sirs,

RE: **SSC PROTOCOL NO. 2775 (RESUBMISSION OF EXPEDITED REQUEST FOR AMENDMENT 2): EFFICACY AND SAFETY OF HIGH-DOSE IVERMECTIN FOR REDUCING MALARIA TRANSMISSION: A DOSE FINDING STUDY-(VERSION 4.1 DATED 14<sup>TH</sup> JANUARY, 2016)**

Reference is made to your letter dated 28<sup>th</sup> January, 2016 requesting for addition of protocol version that was approved. The KEMRI/Scientific and Ethics Review Unit (SERU) acknowledges receipt on 10<sup>th</sup> February, 2016.

This is to inform you that the Committee determines that the issues raised by the Expedited Review Team on 14<sup>th</sup> December, 2015 are adequately addressed. You are therefore **authorized** to implement the following Amendments accordingly:

1. Addition of four study sites: The facilities lie near the main trial site and would allow the study to recruit sufficient patients to finish the study within the study period.

Please note that you are responsible for submitting any further changes to the approved version of the study protocol to SERU for review and the changes should not be initiated until written approval from the SERU is received.

Yours faithfully,

**DR. EVANS AMUKOYE,  
ACTING HEAD,  
KEMRI /SCIENTIFIC AND ETHICS REVIEW UNIT**

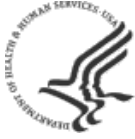

## Memorandum

**Date** February 10, 2016

**From** Jason Abel  
IRB Administrator, Human Research Protection Office

**Subject** CDC Approval of Continued Reliance on a Non-CDC IRB for CDC Protocol #6720: “Efficacy and safety of high-dose ivermectin for reducing malaria transmission: A dose finding study”

**To** AARON SAMUELS  
CGH/DPDM

CDC's Human Research Protection Office has reviewed and approved the request to allow continued reliance on a non-CDC IRB for CDC protocol #6720 “Efficacy and safety of high-dose ivermectin for reducing malaria transmission: A dose finding study” in accordance with 45 CFR 46.114. The protocol has been reviewed and approved by Western IRB for the maximum allowable period of one year, and the IRB’s **approval will expire on 02/08/2017**.

Please submit CDC form 0.1251, Request for Continuing Review of IRB-Approved Protocol, along with certification of current IRB review and approval at the relied-upon institution, approximately six weeks prior to the protocol's expiration date. If you do not yet have certification of continuation approval to include with your submission, please state on the 0.1251 that certification of continuation approval will be forwarded as soon as it is received.

Any problems of a serious nature should be brought to the immediate attention of the Human Research Protection Office.

If you have any questions, please contact your National Center Human Subjects Contact or the CDC Human Research Protection Office at (404) 639-7570 or via e-mail or e-mail: [huma@cdc.gov](mailto:huma@cdc.gov).

cc:  
CGH Human Subjects (CDC)

Menno Smit  
PO Box 1578  
Kisumu 40100  
Kenya

Wednesday, 03 February 2016

Dear Dr Smit,

**Research Protocol (14-002) Efficacy and safety of high-dose Ivermectin in reducing malaria transmission**

Thank you for your letter of 28<sup>th</sup> January 2016 providing the committee with details of the amendment to Ivermal Protocol v4.1 2016-01-14.

This amendment has now been reviewed, noted and accepted on the behalf of the committee. Please continue to adhere to the conditions of approval and to update us of any further changes to the study that may arise.

Yours sincerely,



**Dr Angela Obasi**  
**Chair**  
**LSTM Research Ethics Committee**



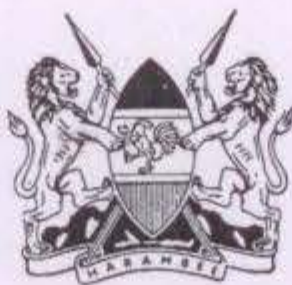

# MINISTRY OF HEALTH

Telegrams: "MEDICAL", Kisumu  
Telephone: 057-2020801/2020803/2020321  
Fax: 057-2024337  
E-mail: [ercjootrh@gmail.com](mailto:ercjootrh@gmail.com)  
*When replying please quote*

JARAMOGI OGINGA ODINGA TEACHING &  
REFERRAL HOSPITAL  
P.O. BOX 849  
KISUMU

ERC.1B/VOL.I/237

3<sup>rd</sup> February, 2016

Ref: .....

Date .....

Dr. Menno Smit  
KEMRI/CDC

**RE: FORMAL APPROVAL FOR AMMENDMENT FOR CLINICAL TRIAL  
ENTITLED: "EFFICACY AND SAFETY OF HIGH-DOSE INVERMECTIN  
FOR REDUCING MALARIA TRANSMISSION: A DOSE FINDING STUDY"**

The JOOTRH ERC (ACCREDITATION NO. 01713) has reviewed your request to amend some changes in the above research and found it satisfactory. You are therefore permitted continue with your research. Note that this amendment is granted.

The below has been amended:

| Protocol Version | Details of change                                          | Date                           |
|------------------|------------------------------------------------------------|--------------------------------|
| 4.1              | Clarification of the sampling strategy of additional sites | 14 <sup>th</sup> January, 2016 |

Please note that you will be required to share the findings of the study in both hard and soft copies upon completion.

The JOOTRH ERC takes this opportunity to thank you for choosing the institution and wishes you the best in your endeavours.

Yours sincerely,

**MAKUNDA NANCY  
FOR: SECRETARY - ERC,  
JOOTRH - KISUMU.**

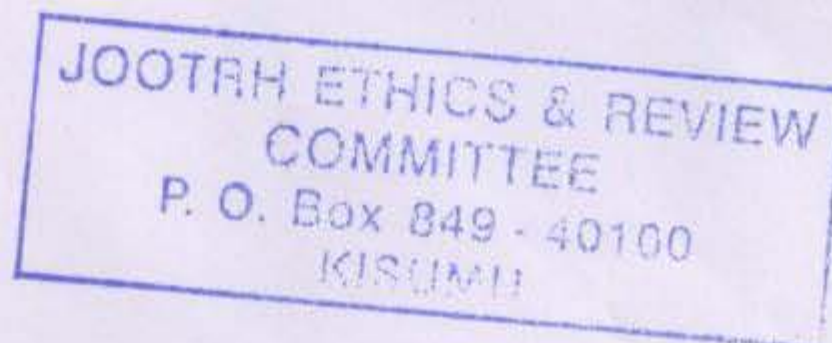

Supplement: resprot_v5i4e213_app4.pdf [file resprot_v5i4e213_app4.pdf]
